# Supplementary material for: Suspected Adverse Drug Reactions Associated with Leukotriene Receptor Antagonists Versus First Line Asthma Medications: A National Registry-Pharmacology Approach
Source: bioRxiv or medRxiv preprint supplement (doi:10.1101/2024.06.12.24308833), 2024-06-13
Supplement: Supplementary file [file media-1.pdf]

## SUPPORTING INFORMATION

### **Suspected Adverse Drug Reactions Associated With Leukotriene Receptor Antagonists Versus First Line Asthma Medications: A National Registry-Pharmacology Approach**

Mohammed Khan,<sup>1</sup> Christine Hirsch,<sup>1\*</sup> and Alan M. Jones<sup>1\*</sup>

<sup>1</sup>School of Pharmacy, University of Birmingham, Edgbaston, B15 2TT, United Kingdom.

Corresponding authors: [c.a.hirsch@bham.ac.uk](mailto:c.a.hirsch@bham.ac.uk) and [a.m.jones.2@bham.ac.uk](mailto:a.m.jones.2@bham.ac.uk)

#### CONTENTS

|                 |                  |
|-----------------|------------------|
| <b>Table S1</b> | <b>Page 2</b>    |
| <b>Table S2</b> | <b>Page 3-4</b>  |
| <b>Table S3</b> | <b>Page 5-12</b> |

**Table S1.** Known side effects of asthma medication.

| Short-acting beta-2 agonist                           | Inhaled Corticosteroid                                | Leukotriene receptor antagonist                                                                    |
|-------------------------------------------------------|-------------------------------------------------------|----------------------------------------------------------------------------------------------------|
| Arrhythmias<br>Fine tremor<br>Headache<br>Tachycardia | Arrhythmias<br>Fine tremor<br>Headache<br>Tachycardia | Aggressive behaviour<br>Anxiety<br>Headache<br>Hallucinations<br>Sleeping issues<br>Abdominal pain |

**Table S2.** Raw system organ class ADRs/fatalities and relative to 100,000  $R_x$  (indicated by (s)).

| SOC                                                                 | Montelukast |            |       |           | Zafirlukast |          |       |           | Beclomethasone |          |       |           | Salbutamol |          |       |           |
|---------------------------------------------------------------------|-------------|------------|-------|-----------|-------------|----------|-------|-----------|----------------|----------|-------|-----------|------------|----------|-------|-----------|
|                                                                     | All         | All (s)    | Fatal | Fatal (s) | All         | All (s)  | Fatal | Fatal (s) | All            | All (s)  | Fatal | Fatal (s) | All        | All (s)  | Fatal | Fatal (s) |
| Total                                                               | 2935        | 15.6473131 | 2     | 0.010663  | 9           | 678.2216 | 0     | 0         | 2372           | 3.376466 | 1     | 0.001423  | 1342       | 1.24699  | 15    | 0.013938  |
| Blood and lymphatic blood disorder                                  | 9           | 0.04798154 | 0     | 0         | 0           | 0        | 0     | 0         | 5              | 0.007117 | 0     | 0         | 2          | 0.001858 | 0     | 0         |
| Cardiac disorders                                                   | 26          | 0.13861334 | 0     | 0         | 0           | 0        | 0     | 0         | 71             | 0.101066 | 0     | 0         | 68         | 0.063186 | 0     | 0         |
| Congenital, familial and genetic disorders                          | 3           | 0.01599385 | 0     | 0         | 0           | 0        | 0     | 0         | 1              | 0.001423 | 0     | 0         | 4          | 0.003717 | 0     | 0         |
| Ear and labyrinth disorders                                         | 9           | 0.04798154 | 0     | 0         | 0           | 0        | 0     | 0         | 11             | 0.015658 | 0     | 0         | 5          | 0.004646 | 0     | 0         |
| Endocrine disorders                                                 | 3           | 0.01599385 | 0     | 0         | 0           | 0        | 0     | 0         | 3              | 0.00427  | 0     | 0         | 1          | 0.000929 | 0     | 0         |
| Eye disorders                                                       | 22          | 0.11728821 | 0     | 0         | 0           | 0        | 0     | 0         | 85             | 0.120995 | 0     | 0         | 24         | 0.022301 | 0     | 0         |
| Gastrointestinal disorders                                          | 204         | 1.08758156 | 0     | 0         | 0           | 0        | 0     | 0         | 221            | 0.314586 | 0     | 0         | 75         | 0.06969  | 0     | 0         |
| General disorders and administration site conditions                | 242         | 1.29017028 | 0     | 0         | 2           | 150.7159 | 0     | 0         | 251            | 0.35729  | 1     | 0.001423  | 206        | 0.191416 | 9     | 0.008363  |
| Hepatobiliary disorders                                             | 4           | 0.02132513 | 0     | 0         | 1           | 75.35795 | 0     | 0         | 1              | 0.001423 | 0     | 0         | 2          | 0.001858 | 0     | 0         |
| Immune system disorders                                             | 15          | 0.07996923 | 0     | 0         | 1           | 75.35795 | 0     | 0         | 30             | 0.042704 | 0     | 0         | 31         | 0.028805 | 0     | 0         |
| Infections and infestations                                         | 21          | 0.11195692 | 0     | 0         | 0           | 0        | 0     | 0         | 48             | 0.068326 | 0     | 0         | 47         | 0.043673 | 3     | 0.002788  |
| Injury, poisoning and procedural complications                      | 62          | 0.33053949 | 0     | 0         | 3           | 226.0739 | 0     | 0         | 121            | 0.17224  | 0     | 0         | 113        | 0.105    | 1     | 0.000929  |
| Investigations                                                      | 27          | 0.14394462 | 0     | 0         | 0           | 0        | 0     | 0         | 38             | 0.054092 | 0     | 0         | 49         | 0.045531 | 0     | 0         |
| Metabolism and nutrition disorders                                  | 18          | 0.09596308 | 0     | 0         | 0           | 0        | 0     | 0         | 10             | 0.014235 | 0     | 0         | 27         | 0.025088 | 0     | 0         |
| Musculoskeletal and connective tissue disorders                     | 78          | 0.41584001 | 0     | 0         | 0           | 0        | 0     | 0         | 88             | 0.125265 | 0     | 0         | 36         | 0.033451 | 0     | 0         |
| Neoplasms benign, malignant and unspecified (incl cysts and polyps) | 2           | 0.01066256 | 0     | 0         | 0           | 0        | 0     | 0         | 1              | 0.001423 | 0     | 0         | 5          | 0.004646 | 0     | 0         |
| Nervous system disorders                                            | 322         | 1.71667285 | 0     | 0         | 1           | 75.35795 | 0     | 0         | 303            | 0.431311 | 0     | 0         | 154        | 0.143097 | 0     | 0         |
| Pregnancy, puerperium and perinatal conditions                      | 4           | 0.02132513 | 0     | 0         | 1           | 75.35795 | 0     | 0         | 0              | 0        | 0     | 0         | 6          | 0.005575 | 0     | 0         |
| Product issues                                                      | 18          | 0.09596308 | 0     | 0         | 0           | 0        | 0     | 0         | 118            | 0.167969 | 0     | 0         | 64         | 0.059469 | 0     | 0         |
| Psychiatric disorders                                               | 1542        | 8.22083706 | 2     | 0.010663  | 0           | 0        | 0     | 0         | 174            | 0.247683 | 0     | 0         | 73         | 0.067832 | 1     | 0.000929  |

|                                                 |     |            |   |   |   |   |   |   |     |          |   |   |     |          |   |          |
|-------------------------------------------------|-----|------------|---|---|---|---|---|---|-----|----------|---|---|-----|----------|---|----------|
| Renal and urinary disorders                     | 11  | 0.0586441  | 0 | 0 | 0 | 0 | 0 | 0 | 3   | 0.00427  | 0 | 0 | 3   | 0.002788 | 0 | 0        |
| Reproductive system and breast disorders        | 2   | 0.01066256 | 0 | 0 | 0 | 0 | 0 | 0 | 7   | 0.009964 | 0 | 0 | 3   | 0.002788 | 0 | 0        |
| Respiratory, thoracic and mediastinal disorders | 128 | 0.68240411 | 0 | 0 | 0 | 0 | 0 | 0 | 587 | 0.835576 | 0 | 0 | 259 | 0.240663 | 1 | 0.000929 |
| Skin and subcutaneous tissue disorders          | 149 | 0.79436104 | 0 | 0 | 0 | 0 | 0 | 0 | 177 | 0.251954 | 0 | 0 | 64  | 0.059469 | 0 | 0        |
| Social circumstances                            | 3   | 0.01599385 | 0 | 0 | 0 | 0 | 0 | 0 | 1   | 0.001423 | 0 | 0 | 5   | 0.004646 | 0 | 0        |
| Surgical and medical procedures                 | 3   | 0.01599385 | 0 | 0 | 0 | 0 | 0 | 0 | 1   | 0.001423 | 0 | 0 | 5   | 0.004646 | 0 | 0        |
| Vascular disorders                              | 8   | 0.04265026 | 0 | 0 | 0 | 0 | 0 | 0 | 16  | 0.022775 | 0 | 0 | 11  | 0.010221 | 0 | 0        |

**Table S3.** Raw Higher Level Group Terms (HLGTs) ADRs/fatalities and relative to 100,000  $R_x$  (indicated by (s)).

| Organ class                                                   | Montelukast |          |       |           | Zafirlukast |         |       |           | Beclometasone |          |       |           | Salbutamol |          |       |           |
|---------------------------------------------------------------|-------------|----------|-------|-----------|-------------|---------|-------|-----------|---------------|----------|-------|-----------|------------|----------|-------|-----------|
|                                                               | All         | All (s)  | Fatal | Fatal (s) | All         | All (s) | Fatal | Fatal (s) | All           | All (s)  | Fatal | Fatal (s) | All        | All (s)  | Fatal | Fatal (s) |
| <b>Blood and lymphatic system disorders</b>                   | 9           | 0.047982 | 0     | 0         | 0           | 0       | 0     | 0         | 5             | 0.007117 | 0     | 0         | 2          | 0.001858 | 0     | 0         |
| Anaemias nonhaemolytic and marrow depression                  | 0           | 0        | 0     | 0         | 0           | 0       | 0     | 0         | 0             | 0        | 0     | 0         | 2          | 0.001858 |       | 0         |
| Coagulopathies and bleeding diatheses (excl thrombocytopenic) | 2           | 0.010663 | 0     | 0         | 0           | 0       | 0     | 0         | 1             | 0.001423 | 0     | 0         | 0          | 0        |       | 0         |
| Haematological disorders NEC                                  | 2           | 0.010663 | 0     | 0         | 0           | 0       | 0     | 0         | 0             | 0        | 0     | 0         | 0          | 0        |       | 0         |
| Haemolyses and related conditions                             | 1           | 0.005331 | 0     | 0         | 0           | 0       | 0     | 0         | 0             | 0        | 0     | 0         | 0          | 0        |       | 0         |
| Platelet disorders                                            | 0           | 0        | 0     | 0         | 0           | 0       | 0     | 0         | 0             | 0        | 0     | 0         | 0          | 0        |       | 0         |
| Red blood cell disorders                                      | 1           | 0.005331 | 0     | 0         | 0           | 0       | 0     | 0         | 0             | 0        | 0     | 0         | 0          | 0        |       | 0         |
| Spleen, lymphatic and reticuloendothelial system disorders    | 2           | 0.010663 | 0     | 0         | 0           | 0       | 0     | 0         | 4             | 0.005694 | 0     | 0         | 0          | 0        |       | 0         |
| White blood cell disorders                                    | 1           | 0.005331 | 0     | 0         | 0           | 0       | 0     | 0         | 0             | 0        | 0     | 0         | 0          | 0        |       | 0         |
|                                                               |             |          |       |           |             |         |       |           |               |          |       |           |            |          |       |           |
| <b>Cardiac disorders</b>                                      | 26          | 0.138613 | 0     | 0         |             | 0       |       | 0         |               | 0        |       | 0         |            | 0        |       | 0         |
| Cardiac arrhythmias                                           | 2           | 0.010663 | 0     | 0         | 0           | 0       | 0     | 0         | 7             | 0.009964 | 0     | 0         | 34         | 0.031593 |       | 0         |
| Cardiac disorders, signs and symptoms NEC                     | 23          | 0.122619 | 0     | 0         | 0           | 0       | 0     | 0         | 60            | 0.085408 | 0     | 0         | 25         | 0.02323  |       | 0         |
| Coronary artery disorders                                     | 0           | 0        | 0     | 0         | 0           | 0       | 0     | 0         | 3             | 0.00427  | 0     | 0         | 5          | 0.004646 |       | 0         |
| Heart failures                                                | 0           | 0        | 0     | 0         | 0           | 0       | 0     | 0         | 0             | 0        | 0     | 0         | 1          | 0.000929 |       | 0         |
| Myocardial disorders                                          | 0           | 0        | 0     | 0         | 0           | 0       | 0     | 0         | 1             | 0.001423 | 0     | 0         | 1          | 0.000929 |       | 0         |
| Pericardial disorders                                         | 1           | 0.005331 | 0     | 0         | 0           | 0       | 0     | 0         | 0             | 0        | 0     | 0         | 2          | 0.001858 |       | 0         |
|                                                               |             |          |       |           |             |         |       |           |               |          |       |           |            |          |       |           |
| <b>Congenital, familial and genetic disorders</b>             | 3           | 0.015994 | 0     | 0         |             | 0       |       | 0         |               | 0        |       | 0         |            | 0        |       | 0         |
| Blood and lymphatic system disorders congenital               | 0           | 0        | 0     | 0         | 0           | 0       | 0     | 0         | 0             | 0        | 0     | 0         | 0          | 0        |       | 0         |
| Cardiac and vascular disorders congenital                     | 0           | 0        | 0     | 0         | 0           | 0       | 0     | 0         | 0             | 0        | 0     | 0         | 3          | 0.002788 |       | 0         |
| Congenital and hereditary disorders NEC                       | 0           | 0        | 0     | 0         | 0           | 0       | 0     | 0         | 0             | 0        | 0     | 0         | 0          | 0        |       | 0         |
| Musculoskeletal and connective tissue disorders congenital    | 0           | 0        | 0     | 0         | 0           | 0       | 0     | 0         | 0             | 0        | 0     | 0         | 0          | 0        |       | 0         |
| Neurological disorders congenital                             | 3           | 0.015994 | 0     | 0         | 0           | 0       | 0     | 0         | 0             | 0        | 0     | 0         | 1          | 0.000929 |       | 0         |
| Skin and subcutaneous tissue disorders congenital             | 0           | 0        | 0     | 0         | 0           | 0       | 0     | 0         | 0             | 0        | 0     | 0         | 0          | 0        |       | 0         |
| Reproductive tract and breast disorders congenital            | 0           | 0        | 0     | 0         | 0           | 0       | 0     | 0         | 1             | 0.001423 | 0     | 0         | 0          | 0        |       | 0         |
|                                                               |             |          |       |           |             |         |       |           |               |          |       |           |            |          |       |           |
| <b>Ear and labyrinth disorders</b>                            | 9           | 0.047982 | 0     | 0         |             | 0       |       | 0         |               | 0        |       | 0         |            | 0        |       | 0         |
| Aural disorders NEC                                           | 3           | 0.015994 | 0     | 0         | 0           | 0       | 0     | 0         | 3             | 0.00427  | 0     | 0         | 1          | 0.000929 |       | 0         |
| Hearing disorders                                             | 2           | 0.010663 | 0     | 0         | 0           | 0       | 0     | 0         | 1             | 0.001423 | 0     | 0         | 0          | 0        |       | 0         |

|                                                                         |     |          |   |   |   |   |   |   |    |          |   |   |    |          |  |   |
|-------------------------------------------------------------------------|-----|----------|---|---|---|---|---|---|----|----------|---|---|----|----------|--|---|
| Inner ear and VIIIth cranial nerve disorders                            | 4   | 0.021325 | 0 | 0 | 0 | 0 | 0 | 0 | 6  | 0.008541 | 0 | 0 | 4  | 0.003717 |  | 0 |
| <i>Middle ear disorders (excl congenital)</i>                           | 0   | 0        | 0 | 0 | 0 | 0 | 0 | 0 | 1  | 0.001423 | 0 | 0 | 0  | 0        |  | 0 |
| <b>Endocrine disorders</b>                                              | 3   | 0.015994 |   | 0 |   | 0 |   | 0 |    | 0        |   | 0 |    | 0        |  | 0 |
| Adrenal gland disorders                                                 | 2   | 0.010663 | 0 | 0 | 0 | 0 |   | 0 | 2  | 0.002847 | 0 | 0 | 0  | 0        |  | 0 |
| Hypothalamus and pituitary gland disorders                              | 0   | 0        | 0 | 0 | 0 | 0 |   | 0 | 1  | 0.001423 | 0 | 0 | 0  | 0        |  | 0 |
| Thyroid gland disorders                                                 | 1   | 0.005331 | 0 | 0 | 0 | 0 |   | 0 | 0  | 0        | 0 | 0 | 1  | 0.000929 |  | 0 |
| <b>Eye disorders</b>                                                    | 22  | 0.117288 | 0 | 0 |   | 0 |   | 0 |    | 0        |   | 0 |    | 0        |  | 0 |
| Anterior eye structural change, deposit and degeneration                | 0   | 0        | 0 | 0 | 0 | 0 |   | 0 | 5  | 0.007117 | 0 | 0 | 4  | 0.003717 |  | 0 |
| Eye disorders NEC                                                       | 5   | 0.026656 | 0 | 0 | 0 | 0 |   | 0 | 21 | 0.029893 | 0 | 0 | 6  | 0.005575 |  | 0 |
| <b>Glaucoma and ocular hypertension</b>                                 | 0   | 0        | 0 | 0 | 0 | 0 |   | 0 | 3  | 0.00427  | 0 | 0 | 3  | 0.002788 |  | 0 |
| <b>Ocular haemorrhages and vascular disorders NEC</b>                   | 0   | 0        | 0 | 0 | 0 | 0 |   | 0 | 2  | 0.002847 | 0 | 0 | 3  | 0.002788 |  | 0 |
| Ocular infections, irritations and inflammations                        | 3   | 0.015994 | 0 | 0 | 0 | 0 |   | 0 | 16 | 0.022775 | 0 | 0 | 0  | 0        |  | 0 |
| Ocular neuromuscular disorders                                          | 6   | 0.031988 | 0 | 0 | 0 | 0 |   | 0 | 1  | 0.001423 | 0 | 0 | 1  | 0.000929 |  | 0 |
| Ocular sensory symptoms NEC                                             | 0   | 0        | 0 | 0 | 0 | 0 |   | 0 | 5  | 0.007117 | 0 | 0 | 0  | 0        |  | 0 |
| Ocular structural change, deposit and degeneration NEC                  | 1   | 0.005331 | 0 | 0 | 0 | 0 |   | 0 | 0  | 0        | 0 | 0 | 0  | 0        |  | 0 |
| <b>Retina, choroid and vitreous haemorrhages and vascular disorders</b> | 0   | 0        | 0 | 0 | 0 | 0 |   | 0 | 6  | 0.008541 | 0 | 0 | 0  | 0        |  | 0 |
| Vision disorders                                                        | 7   | 0.037319 | 0 | 0 | 0 | 0 |   | 0 | 26 | 0.03701  | 0 | 0 | 7  | 0.006504 |  | 0 |
| <b>Gastrointestinal disorders</b>                                       | 204 | 1.087582 | 0 | 0 |   | 0 |   | 0 |    | 0        |   | 0 |    | 0        |  | 0 |
| <b>Abdominal hernias and other abdominal wall conditions</b>            | 0   | 0        | 0 | 0 | 0 | 0 |   | 0 | 0  | 0        | 0 | 0 | 1  | 0.000929 |  | 0 |
| Anal and rectal conditions NEC                                          | 0   | 0        | 0 | 0 | 0 | 0 |   | 0 | 0  | 0        | 0 | 0 | 0  | 0        |  | 0 |
| <b>Benign neoplasms gastrointestinal</b>                                | 0   | 0        | 0 | 0 | 0 | 0 |   | 0 | 1  | 0.001423 | 0 | 0 | 0  | 0        |  | 0 |
| Dental and gingival conditions                                          | 2   | 0.010663 | 0 | 0 | 0 | 0 |   | 0 | 8  | 0.011388 | 0 | 0 | 2  | 0.001858 |  | 0 |
| <b>Diverticular disorders</b>                                           | 0   | 0        | 0 | 0 | 0 | 0 |   | 0 | 0  | 0        | 0 | 0 | 1  | 0.000929 |  | 0 |
| Exocrine pancreas conditions                                            | 0   | 0        | 0 | 0 | 0 | 0 |   | 0 | 0  | 0        | 0 | 0 | 0  | 0        |  | 0 |
| Gastrointestinal conditions NEC                                         | 2   | 0.010663 | 0 | 0 | 0 | 0 |   | 0 | 0  | 0        | 0 | 0 | 1  | 0.000929 |  | 0 |
| Gastrointestinal haemorrhages NEC                                       | 1   | 0.005331 | 0 | 0 | 0 | 0 |   | 0 | 0  | 0        | 0 | 0 | 0  | 0        |  | 0 |
| Gastrointestinal inflammatory conditions                                | 2   | 0.010663 | 0 | 0 | 0 | 0 |   | 0 | 2  | 0.002847 | 0 | 0 | 1  | 0.000929 |  | 0 |
| Gastrointestinal motility and defaecation conditions                    | 38  | 0.202589 | 0 | 0 | 0 | 0 |   | 0 | 23 | 0.03274  | 0 | 0 | 13 | 0.01208  |  | 0 |
| Gastrointestinal signs and symptoms                                     | 122 | 0.650416 | 0 | 0 | 0 | 0 |   | 0 | 72 | 0.10249  | 0 | 0 | 28 | 0.026018 |  | 0 |
| <b>Gastrointestinal stenosis and obstruction</b>                        | 0   | 0        | 0 | 0 | 0 | 0 |   | 0 | 1  | 0.001423 | 0 | 0 | 0  | 0        |  | 0 |
| Gastrointestinal ulceration and perforation                             | 0   | 0        | 0 | 0 | 0 | 0 |   | 0 | 0  | 0        | 0 | 0 | 0  | 0        |  | 0 |
| <b>Gastrointestinal vascular conditions</b>                             | 0   | 0        | 0 | 0 | 0 | 0 |   | 0 | 0  | 0        | 0 | 0 | 1  | 0.000929 |  | 0 |
| Malabsorption conditions                                                | 1   | 0.005331 | 0 | 0 | 0 | 0 |   | 0 | 0  | 0        | 0 | 0 | 0  | 0        |  | 0 |
| Oral soft tissue conditions                                             | 20  | 0.106626 | 0 | 0 | 0 | 0 |   | 0 | 76 | 0.108184 | 0 | 0 | 20 | 0.018584 |  | 0 |

|                                                             |     |          |   |   |   |          |   |   |     |          |   |          |     |          |   |   |
|-------------------------------------------------------------|-----|----------|---|---|---|----------|---|---|-----|----------|---|----------|-----|----------|---|---|
| Peritoneal and retroperitoneal conditions                   | 0   | 0        | 0 | 0 | 0 | 0        | 0 | 0 | 0   | 0        | 0 | 0        | 0   | 0        | 0 |   |
| Salivary gland conditions                                   | 7   | 0.037319 | 0 | 0 | 0 | 0        | 0 | 0 | 11  | 0.015658 | 0 | 0        | 3   | 0.002788 | 0 |   |
| Tongue conditions                                           | 9   | 0.047982 | 0 | 0 | 0 | 0        | 0 | 0 | 27  | 0.038434 | 0 | 0        | 4   | 0.003717 | 0 |   |
|                                                             |     |          |   |   |   |          |   |   |     |          |   |          |     |          |   |   |
| <b>General disorders and administration site conditions</b> | 242 | 1.29017  | 0 | 0 |   | 0        |   | 0 |     | 0        |   | 0        |     | 0        |   | 0 |
| Administration site reactions                               | 1   | 0.005331 | 0 | 0 | 0 | 0        | 0 | 0 | 7   | 0.009964 | 0 | 0        | 2   | 0.001858 |   | 0 |
| Body temperature conditions                                 | 9   | 0.047982 | 0 | 0 | 0 | 0        | 0 | 0 | 9   | 0.012811 | 0 | 0        | 3   | 0.002788 |   | 0 |
| <b>Complications associated with device</b>                 | 0   | 0        | 0 | 0 | 0 | 0        | 0 | 0 | 2   | 0.002847 | 0 | 0        | 0   | 0        |   | 0 |
| Fatal outcomes                                              | 0   | 0        | 0 | 0 | 0 | 0        | 0 | 0 | 0   | 0        | 0 | 0        | 9   | 0.008363 |   | 0 |
| General system disorders NEC                                | 179 | 0.9543   | 0 | 0 | 0 | 0        | 0 | 0 | 182 | 0.259071 | 1 | 0.001423 | 133 | 0.123584 |   | 0 |
| Therapeutic and nontherapeutic effects (excl toxicity)      | 53  | 0.282558 | 0 | 0 | 2 | 150.7159 | 0 | 0 | 50  | 0.071173 | 0 | 0        | 59  | 0.054823 |   | 0 |
| Tissue disorders NEC                                        | 0   | 0        | 0 | 0 | 0 | 0        | 0 | 0 | 1   | 0.001423 | 0 | 0        | 0   | 0        |   | 0 |
|                                                             |     |          |   |   |   |          |   |   |     |          |   |          |     |          |   |   |
| <b>Hepatobiliary disorders</b>                              | 4   | 0.021325 | 0 | 0 |   | 0        |   | 0 |     | 0        |   | 0        |     | 0        |   | 0 |
| Gallbladder disorders                                       | 0   | 0        | 0 | 0 | 0 | 0        | 0 | 0 | 1   | 0.001423 | 0 | 0        | 1   | 0.000929 |   | 0 |
| Hepatic and hepatobiliary disorders                         | 4   | 0.021325 | 0 | 0 | 0 | 0        | 0 | 0 | 0   | 0        | 0 | 0        | 1   | 0.000929 |   | 0 |
|                                                             |     |          |   |   |   |          |   |   |     |          |   |          |     |          |   |   |
| <b>Immune system disorders</b>                              | 15  | 0.079969 | 0 | 0 |   | 0        |   | 0 |     | 0        |   | 0        |     | 0        |   | 0 |
| Allergic conditions                                         | 12  | 0.063975 | 0 | 0 | 1 | 75.35795 | 0 | 0 | 29  | 0.041281 | 0 | 0        | 28  | 0.026018 |   | 0 |
| <b>Autoimmune disorders</b>                                 | 0   | 0        | 0 | 0 | 0 | 0        | 0 | 0 | 1   | 0.001423 | 0 | 0        | 2   | 0.001858 |   | 0 |
| Immune disorders NEC                                        | 3   | 0.015994 | 0 | 0 | 0 | 0        | 0 | 0 | 0   | 0        | 0 | 0        | 1   | 0.000929 |   | 0 |
|                                                             |     |          |   |   |   |          |   |   |     |          |   |          |     |          |   |   |
| <b>Infections and infestations</b>                          | 21  | 0.111957 | 0 | 0 |   | 0        |   | 0 |     | 0        |   | 0        |     | 0        |   | 0 |
| Ancillary infectious topics                                 | 0   | 0        | 0 | 0 | 0 | 0        | 0 | 0 | 0   | 0        | 0 | 0        | 0   | 0        |   | 0 |
| Bacterial infectious disorders                              | 0   | 0        | 0 | 0 | 0 | 0        | 0 | 0 | 1   | 0.001423 | 0 | 0        | 1   | 0.000929 |   | 0 |
| Fungal infectious disorders                                 | 4   | 0.021325 | 0 | 0 | 0 | 0        | 0 | 0 | 21  | 0.029893 | 0 | 0        | 9   | 0.008363 |   | 0 |
| Infections - pathogen unspecified                           | 13  | 0.069307 | 0 | 0 | 1 | 75.35795 | 0 | 0 | 15  | 0.021352 | 0 | 0        | 30  | 0.027876 |   | 0 |
| Mycoplasmal infectious disorders                            | 0   | 0        | 0 | 0 | 0 | 0        | 0 | 0 | 0   | 0        | 0 | 0        | 0   | 0        |   | 0 |
| Viral infectious disorders                                  | 4   | 0.021325 | 0 | 0 | 0 | 0        | 0 | 0 | 11  | 0.015658 | 0 | 0        | 7   | 0.006504 |   | 0 |
|                                                             |     |          |   |   |   |          |   |   |     |          |   |          |     |          |   |   |
| <b>Injury, poisoning and procedural complications</b>       | 62  | 0.330539 | 0 | 0 |   | 0        |   | 0 |     | 0        |   | 0        |     | 0        |   | 0 |
| Bone and joint injuries                                     | 0   | 0        | 0 | 0 | 0 | 0        | 0 | 0 | 2   | 0.002847 | 0 | 0        | 0   | 0        |   | 0 |
| Exposures, chemical injuries and poisoning                  | 2   | 0.010663 | 0 | 0 | 1 | 75.35795 | 0 | 0 | 5   | 0.007117 | 0 | 0        | 17  | 0.015796 |   | 0 |
| Injuries NEC                                                | 14  | 0.074638 | 0 | 0 | 0 | 0        | 0 | 0 | 19  | 0.027046 | 0 | 0        | 11  | 0.010221 |   | 0 |
| Medication errors and other product use errors and issues   | 41  | 0.218583 | 0 | 0 | 1 | 75.35795 | 0 | 0 | 82  | 0.116724 | 0 | 0        | 64  | 0.059469 |   | 0 |
| Off label uses and intentional product misuses/use issues   | 3   | 0.015994 | 0 | 0 | 1 | 75.35795 | 0 | 0 | 8   | 0.011388 | 0 | 0        | 10  | 0.009292 |   | 0 |
| Overdoses and underdoses NEC                                | 2   | 0.010663 | 0 | 0 | 0 | 0        | 0 | 0 | 4   | 0.005694 | 0 | 0        | 11  | 0.010221 |   | 0 |

|                                                                    |    |          |   |   |   |   |   |   |    |          |   |   |    |          |   |
|--------------------------------------------------------------------|----|----------|---|---|---|---|---|---|----|----------|---|---|----|----------|---|
| Procedural related injuries and complications NEC                  | 0  | 0        | 0 | 0 | 0 | 0 | 0 | 0 | 1  | 0.001423 | 0 | 0 | 0  | 0        | 0 |
| <b>Investigations</b>                                              | 27 | 0.143945 | 0 | 0 | 0 | 0 | 0 | 0 | 0  | 0        | 0 | 0 | 0  | 0        | 0 |
| Cardiac and vascular investigations (excl enzyme tests)            | 7  | 0.037319 | 0 | 0 | 0 | 0 | 0 | 0 | 17 | 0.024199 | 0 | 0 | 10 | 0.009292 | 0 |
| <b>Cytogenetic investigations and genetic analyses</b>             | 0  | 0        | 0 | 0 | 0 | 0 | 0 | 0 | 1  | 0.001423 | 0 | 0 | 0  | 0        | 0 |
| Enzyme investigations NEC                                          | 1  | 0.005331 | 0 | 0 | 0 | 0 | 0 | 0 | 0  | 0        | 0 | 0 | 0  | 0        | 0 |
| <b>Gastrointestinal investigations</b>                             | 0  | 0        | 0 | 0 | 0 | 0 | 0 | 0 | 0  | 0        | 0 | 0 | 1  | 0.000929 | 0 |
| Haematology investigations (incl blood groups)                     | 0  | 0        | 0 | 0 | 0 | 0 | 0 | 0 | 0  | 0        | 0 | 0 | 2  | 0.001858 | 0 |
| Hepatobiliary investigations                                       | 3  | 0.015994 | 0 | 0 | 0 | 0 | 0 | 0 | 0  | 0        | 0 | 0 | 2  | 0.001858 | 0 |
| Lipid analyses                                                     | 0  | 0        | 0 | 0 | 0 | 0 | 0 | 0 | 0  | 0        | 0 | 0 | 2  | 0.001858 | 0 |
| Immunology and allergy investigations                              | 0  | 0        | 0 | 0 | 0 | 0 | 0 | 0 | 0  | 0        | 0 | 0 | 0  | 0        | 0 |
| Investigations, imaging and histopathology procedures NEC          | 1  | 0.005331 | 0 | 0 | 0 | 0 | 0 | 0 | 0  | 0        | 0 | 0 | 0  | 0        | 0 |
| Metabolic, nutritional and blood gas investigations                | 6  | 0.031988 | 0 | 0 | 0 | 0 | 0 | 0 | 3  | 0.00427  | 0 | 0 | 18 | 0.016726 | 0 |
| Microbiology and serology investigations                           | 0  | 0        | 0 | 0 | 0 | 0 | 0 | 0 | 0  | 0        | 0 | 0 | 1  | 0.000929 | 0 |
| <b>Neurological, special senses and psychiatric investigations</b> | 0  | 0        | 0 | 0 | 0 | 0 | 0 | 0 | 2  | 0.002847 | 0 | 0 | 2  | 0.001858 | 0 |
| <b>Protein and chemistry analyses NEC</b>                          | 0  | 0        | 0 | 0 | 0 | 0 | 0 | 0 | 2  | 0.002847 | 0 | 0 | 0  | 0        | 0 |
| Physical examination and organ system status topics                | 7  | 0.037319 | 0 | 0 | 0 | 0 | 0 | 0 | 8  | 0.011388 | 0 | 0 | 5  | 0.004646 | 0 |
| Renal and urinary tract investigations and urinalyses              | 0  | 0        | 0 | 0 | 0 | 0 | 0 | 0 | 1  | 0.001423 | 0 | 0 | 0  | 0        | 0 |
| Respiratory and pulmonary investigations (excl blood gases)        | 1  | 0.005331 | 0 | 0 | 0 | 0 | 0 | 0 | 3  | 0.00427  | 0 | 0 | 7  | 0.006504 | 0 |
| Toxicology and therapeutic drug monitoring                         | 1  | 0.005331 | 0 | 0 | 0 | 0 | 0 | 0 | 1  | 0.001423 | 0 | 0 | 0  | 0        | 0 |
| <b>Metabolism and nutrition disorders</b>                          | 18 | 0.095963 | 0 | 0 | 0 | 0 | 0 | 0 | 0  | 0        | 0 | 0 | 0  | 0        | 0 |
| Acid-base disorders                                                | 0  | 0        | 0 | 0 | 0 | 0 | 0 | 0 | 0  | 0        | 0 | 0 | 9  | 0.008363 | 0 |
| Appetite and general nutritional disorders                         | 14 | 0.074638 | 0 | 0 | 0 | 0 | 0 | 0 | 6  | 0.008541 | 0 | 0 | 4  | 0.003717 | 0 |
| Bone, calcium, magnesium and phosphorus metabolism disorders       | 0  | 0        | 0 | 0 | 0 | 0 | 0 | 0 | 0  | 0        | 0 | 0 | 1  | 0.000929 | 0 |
| Electrolyte and fluid balance conditions                           | 3  | 0.015994 | 0 | 0 | 0 | 0 | 0 | 0 | 1  | 0.001423 | 0 | 0 | 11 | 0.010221 | 0 |
| Food intolerance syndromes                                         | 0  | 0        | 0 | 0 | 0 | 0 | 0 | 0 | 0  | 0        | 0 | 0 | 0  | 0        | 0 |
| Glucose metabolism disorders (incl diabetes mellitus)              | 0  | 0        | 0 | 0 | 0 | 0 | 0 | 0 | 3  | 0.00427  | 0 | 0 | 1  | 0.000929 | 0 |
| Lipid metabolism disorders                                         | 1  | 0.005331 | 0 | 0 | 0 | 0 | 0 | 0 | 0  | 0        | 0 | 0 | 0  | 0        | 0 |
| Purine and pyrimidine metabolism disorders                         | 0  | 0        | 0 | 0 | 0 | 0 | 0 | 0 | 0  | 0        | 0 | 0 | 0  | 0        | 0 |



|                                                                                               |     |          |   |   |   |   |   |   |    |          |   |   |    |          |  |   |
|-----------------------------------------------------------------------------------------------|-----|----------|---|---|---|---|---|---|----|----------|---|---|----|----------|--|---|
| <b>Vitamin related disorders</b>                                                              | 0   | 0        | 0 | 0 | 0 | 0 | 0 | 0 | 0  | 0        | 0 | 0 | 1  | 0.000929 |  | 0 |
|                                                                                               |     |          |   |   |   |   |   |   |    |          |   |   |    |          |  |   |
| <b>Musculoskeletal and connective tissue disorders</b>                                        | 78  | 0.41584  | 0 | 0 |   | 0 |   | 0 |    | 0        |   | 0 |    | 0        |  | 0 |
| Bone disorders (excl congenital and fractures)                                                | 1   | 0.005331 | 0 | 0 | 0 | 0 | 0 | 0 | 5  | 0.007117 | 0 | 0 | 0  | 0        |  | 0 |
| Connective tissue disorders (excl congenital)                                                 | 1   | 0.005331 | 0 | 0 | 0 | 0 | 0 | 0 | 1  | 0.001423 | 0 | 0 | 0  | 0        |  | 0 |
| Fractures                                                                                     | 0   | 0        | 0 | 0 | 0 | 0 | 0 | 0 | 0  | 0        | 0 | 0 | 0  | 0        |  | 0 |
| Joint disorders                                                                               | 25  | 0.133282 | 0 | 0 | 0 | 0 | 0 | 0 | 13 | 0.018505 | 0 | 0 | 10 | 0.009292 |  | 0 |
| Muscle disorders                                                                              | 39  | 0.20792  | 0 | 0 | 0 | 0 | 0 | 0 | 53 | 0.075444 | 0 | 0 | 17 | 0.015796 |  | 0 |
| <b>Musculoskeletal and connective tissue deformities (incl intervertebral disc disorders)</b> | 0   | 0        | 0 | 0 | 0 | 0 | 0 | 0 | 0  | 0        | 0 | 0 | 1  | 0.000929 |  | 0 |
| Musculoskeletal and connective tissue disorders NEC                                           | 12  | 0.063975 | 0 | 0 | 0 | 0 | 0 | 0 | 14 | 0.019929 | 0 | 0 | 8  | 0.007434 |  | 0 |
| Synovial and bursal disorders                                                                 | 0   | 0        | 0 | 0 | 0 | 0 | 0 | 0 | 0  | 0        | 0 | 0 | 0  | 0        |  | 0 |
| Tendon, ligament and cartilage disorders                                                      | 0   | 0        | 0 | 0 | 0 | 0 | 0 | 0 | 2  | 0.002847 | 0 | 0 | 0  | 0        |  | 0 |
|                                                                                               |     |          |   |   |   |   |   |   |    |          |   |   |    |          |  |   |
| <b>Neoplasms benign, malignant and unspecified (incl cysts and polyps)</b>                    | 2   | 0.010663 | 0 | 0 |   | 0 |   | 0 |    | 0        |   | 0 |    | 0        |  | 0 |
| Breast neoplasms benign (incl nipple)                                                         | 1   | 0.005331 | 0 | 0 | 0 | 0 | 0 | 0 | 0  | 0        | 0 | 0 | 0  | 0        |  | 0 |
| Cutaneous neoplasms benign                                                                    | 1   | 0.005331 | 0 | 0 | 0 | 0 | 0 | 0 | 0  | 0        | 0 | 0 | 1  | 0.000929 |  | 0 |
| Gastrointestinal neoplasms malignant and unspecified                                          | 0   | 0        | 0 | 0 | 0 | 0 | 0 | 0 | 0  | 0        | 0 | 0 | 0  | 0        |  | 0 |
|                                                                                               | 0   | 0        | 0 | 0 | 0 | 0 | 0 | 0 | 0  | 0        | 0 | 0 | 1  | 0.000929 |  | 0 |
| <b>Miscellaneous and site unspecified neoplasms benign</b>                                    |     |          |   |   |   |   |   |   |    |          |   |   |    |          |  |   |
| <b>Miscellaneous and site unspecified neoplasms malignant and unspecified</b>                 | 0   | 0        | 0 | 0 | 0 | 0 | 0 | 0 | 0  | 0        | 0 | 0 | 2  | 0.001858 |  | 0 |
| <b>Respiratory and mediastinal neoplasms malignant and unspecified</b>                        | 0   | 0        | 0 | 0 | 0 | 0 | 0 | 0 | 0  | 0        | 0 | 0 | 1  | 0.000929 |  | 0 |
| Leukaemias                                                                                    | 0   | 0        | 0 | 0 | 0 | 0 | 0 | 0 | 0  | 0        | 0 | 0 | 0  | 0        |  | 0 |
| <b>Plasma cell neoplasms</b>                                                                  |     | 0        |   | 0 |   | 0 |   | 0 | 1  | 0.001423 | 0 | 0 | 0  | 0        |  | 0 |
| Skin neoplasms malignant and unspecified                                                      | 0   | 0        | 0 | 0 | 0 | 0 | 0 | 0 | 0  | 0        | 0 | 0 | 0  | 0        |  | 0 |
|                                                                                               |     |          |   |   |   |   |   |   |    |          |   |   |    |          |  |   |
| <b>Nervous system disorders</b>                                                               | 322 | 1.716673 | 0 | 0 |   | 0 |   | 0 |    | 0        |   | 0 |    | 0        |  | 0 |
| Central nervous system vascular disorders                                                     | 0   | 0        | 0 | 0 | 0 | 0 | 0 | 0 | 0  | 0        | 0 | 0 | 2  | 0.001858 |  | 0 |
| Cranial nerve disorders (excl neoplasms)                                                      | 1   | 0.005331 | 0 | 0 | 0 | 0 | 0 | 0 | 6  | 0.008541 | 0 | 0 | 2  | 0.001858 |  | 0 |
| Demyelinating disorders                                                                       | 0   | 0        | 0 | 0 | 0 | 0 | 0 | 0 | 0  | 0        | 0 | 0 | 1  | 0.000929 |  | 0 |
| Encephalopathies                                                                              | 0   | 0        | 0 | 0 | 0 | 0 | 0 | 0 | 0  | 0        | 0 | 0 | 0  | 0        |  | 0 |
| Headaches                                                                                     | 85  | 0.453159 | 0 | 0 | 0 | 0 | 0 | 0 | 91 | 0.129536 | 0 | 0 | 23 | 0.021372 |  | 0 |
| Increased intracranial pressure and hydrocephalus                                             | 0   | 0        | 0 | 0 | 0 | 0 | 0 | 0 | 0  | 0        | 0 | 0 | 0  | 0        |  | 0 |
| Mental impairment disorders                                                                   | 46  | 0.245239 | 0 | 0 | 0 | 0 | 0 | 0 | 5  | 0.007117 | 0 | 0 | 5  | 0.004646 |  | 0 |

|                                                                                |      |          |   |          |   |          |   |   |     |          |   |   |    |          |  |   |
|--------------------------------------------------------------------------------|------|----------|---|----------|---|----------|---|---|-----|----------|---|---|----|----------|--|---|
| Movement disorders (incl parkinsonism)                                         | 53   | 0.282558 | 0 | 0        | 0 | 0        | 0 | 0 | 87  | 0.123842 | 0 | 0 | 47 | 0.043673 |  | 0 |
| Nervous system neoplasms benign                                                | 0    | 0        | 0 | 0        | 0 | 0        | 0 | 0 | 0   | 0        | 0 | 0 | 1  | 0.000929 |  | 0 |
| Neurological disorders NEC                                                     | 121  | 0.645085 | 0 | 0        | 1 | 75.35795 | 0 | 0 | 110 | 0.156581 | 0 | 0 | 59 | 0.054823 |  | 0 |
| Neurological disorders of the eye                                              | 0    | 0        | 0 | 0        | 0 | 0        | 0 | 0 | 0   | 0        | 0 | 0 | 0  | 0        |  | 0 |
| Neuromuscular disorders                                                        | 0    | 0        | 0 | 0        | 0 | 0        | 0 | 0 | 0   | 0        | 0 | 0 | 7  | 0.006504 |  | 0 |
| Peripheral neuropathies                                                        | 4    | 0.021325 | 0 | 0        | 0 | 0        | 0 | 0 | 1   | 0.001423 | 0 | 0 | 3  | 0.002788 |  | 0 |
| Seizures (incl subtypes)                                                       | 10   | 0.053313 | 0 | 0        | 0 | 0        | 0 | 0 | 2   | 0.002847 | 0 | 0 | 0  | 0        |  | 0 |
| Sleep disturbances (incl subtypes)                                             | 2    | 0.010663 | 0 | 0        | 0 | 0        | 0 | 0 | 0   | 0        | 0 | 0 | 2  | 0.001858 |  | 0 |
| Spinal cord and nerve root disorders                                           | 0    | 0        | 0 | 0        | 0 | 0        | 0 | 0 | 1   | 0.001423 | 0 | 0 | 1  | 0.000929 |  | 0 |
| Structural brain disorders                                                     | 0    | 0        | 0 | 0        | 0 | 0        | 0 | 0 | 0   | 0        | 0 | 0 | 1  | 0.000929 |  | 0 |
|                                                                                |      |          |   |          |   |          |   |   |     |          |   |   |    |          |  |   |
| <b>Pregnancy, puerperium and perinatal conditions</b>                          | 4    | 0.021325 | 0 | 0        |   | 0        |   | 0 |     | 0        |   | 0 | 6  | 0.005575 |  | 0 |
| Abortions and stillbirth                                                       | 0    | 0        | 0 | 0        | 1 | 75.35795 | 0 | 0 | 0   | 0        | 0 | 0 | 0  | 0        |  | 0 |
| Foetal complications                                                           | 1    | 0.005331 | 0 | 0        | 0 | 0        | 0 | 0 | 0   | 0        | 0 | 0 | 0  | 0        |  | 0 |
| Maternal complications of labour and delivery                                  | 2    | 0.010663 | 0 | 0        | 0 | 0        | 0 | 0 | 0   | 0        | 0 | 0 | 0  | 0        |  | 0 |
| Maternal complications of pregnancy                                            | 0    | 0        | 0 | 0        | 0 | 0        | 0 | 0 | 0   | 0        | 0 | 0 | 2  | 0.001858 |  | 0 |
| Neonatal and perinatal conditions                                              | 1    | 0.005331 | 0 | 0        | 0 | 0        | 0 | 0 | 0   | 0        | 0 | 0 | 3  | 0.002788 |  | 0 |
| Pregnancy, labour, delivery and postpartum conditions                          | 0    | 0        | 0 | 0        | 0 | 0        | 0 | 0 | 0   | 0        | 0 | 0 | 1  | 0.000929 |  | 0 |
|                                                                                |      |          |   |          |   |          |   |   |     |          |   |   |    |          |  |   |
| <b>Product issues</b>                                                          | 18   | 0.095963 | 0 | 0        |   | 0        |   | 0 |     | 0        |   | 0 | 64 | 0.059469 |  | 0 |
| Device issues                                                                  | 0    | 0        | 0 | 0        | 0 | 0        | 0 | 0 | 51  | 0.072597 | 0 | 0 | 10 | 0.009292 |  | 0 |
| Product quality, supply, distribution, manufacturing and quality system issues | 18   | 0.095963 | 0 | 0        | 0 | 0        | 0 | 0 | 67  | 0.095372 | 0 | 0 | 54 | 0.050177 |  | 0 |
|                                                                                |      |          |   |          |   |          |   |   |     |          |   |   |    |          |  |   |
| <b>Psychiatric disorders</b>                                                   | 1542 | 8.220837 | 2 | 0.010663 |   | 0        |   | 0 |     | 0        |   | 0 | 73 | 0.067832 |  | 0 |
| Adjustment disorders (incl subtypes)                                           | 0    | 0        | 0 | 0        | 0 | 0        | 0 | 0 | 0   | 0        | 0 | 0 | 0  | 0        |  | 0 |
| Anxiety disorders and symptoms                                                 | 275  | 1.466103 | 0 | 0        | 0 | 0        | 0 | 0 | 58  | 0.082561 | 0 | 0 | 22 | 0.020442 |  | 0 |
| Changes in physical activity                                                   | 37   | 0.197257 | 0 | 0        | 0 | 0        | 0 | 0 | 8   | 0.011388 | 0 | 0 | 1  | 0.000929 |  | 0 |
| Cognitive and attention disorders and disturbances                             | 6    | 0.031988 | 0 | 0        | 0 | 0        | 0 | 0 | 1   | 0.001423 | 0 | 0 | 0  | 0        |  | 0 |
| Communication disorders and disturbances                                       | 15   | 0.079969 | 0 | 0        | 0 | 0        | 0 | 0 | 1   | 0.001423 | 0 | 0 | 0  | 0        |  | 0 |
| Deliria (incl confusion)                                                       | 19   | 0.101294 | 0 | 0        | 0 | 0        | 0 | 0 | 5   | 0.007117 | 0 | 0 | 3  | 0.002788 |  | 0 |
| Depressed mood disorders and disturbances                                      | 162  | 0.863668 | 0 | 0        | 0 | 0        | 0 | 0 | 17  | 0.024199 | 0 | 0 | 8  | 0.007434 |  | 0 |
| Developmental disorders NEC                                                    | 1    | 0.005331 | 0 | 0        | 0 | 0        | 0 | 0 | 0   | 0        | 0 | 0 | 0  | 0        |  | 0 |
| Dissociative disorders                                                         | 5    | 0.026656 | 0 | 0        | 0 | 0        | 0 | 0 | 0   | 0        | 0 | 0 | 0  | 0        |  | 0 |
| Disturbances in thinking and perception                                        | 76   | 0.405177 | 0 | 0        | 0 | 0        | 0 | 0 | 5   | 0.007117 | 0 | 0 | 6  | 0.005575 |  | 0 |
| Eating disorders and disturbances                                              | 0    | 0        | 0 | 0        | 0 | 0        | 0 | 0 | 0   | 0        | 0 | 0 | 0  | 0        |  | 0 |

|                                                                    |     |          |   |          |   |   |   |   |     |          |   |   |     |          |   |   |
|--------------------------------------------------------------------|-----|----------|---|----------|---|---|---|---|-----|----------|---|---|-----|----------|---|---|
| Impulse control disorders NEC                                      | 4   | 0.021325 | 0 | 0        | 0 | 0 | 0 | 0 | 0   | 0        | 0 | 0 | 0   | 0        | 0 | 0 |
| Manic and bipolar mood disorders and disturbances                  | 6   | 0.031988 | 0 | 0        | 0 | 0 | 0 | 0 | 0   | 0        | 0 | 0 | 0   | 0        | 0 | 0 |
| Mood disorders and disturbances NEC                                | 182 | 0.970293 | 0 | 0        | 0 | 0 | 0 | 0 | 25  | 0.035587 | 0 | 0 | 5   | 0.004646 | 0 | 0 |
| Personality disorders and disturbances in behaviour                | 144 | 0.767705 | 0 | 0        | 0 | 0 | 0 | 0 | 14  | 0.019929 | 0 | 0 | 1   | 0.000929 | 0 | 0 |
| Psychiatric and behavioural symptoms NEC                           | 65  | 0.346533 | 0 | 0        | 0 | 0 | 0 | 0 | 7   | 0.009964 | 0 | 0 | 1   | 0.000929 | 0 | 0 |
| Psychiatric disorders NEC                                          | 26  | 0.138613 | 0 | 0        | 0 | 0 | 0 | 0 | 0   | 0        | 0 | 0 | 6   | 0.005575 | 0 | 0 |
| Schizophrenia and other psychotic disorders                        | 12  | 0.063975 | 0 | 0        | 0 | 0 | 0 | 0 | 0   | 0        | 0 | 0 | 1   | 0.000929 | 0 | 0 |
| Sexual dysfunctions, disturbances and gender identity disorders    | 0   | 0        | 0 | 0        | 0 | 0 | 0 | 0 | 0   | 0        | 0 | 0 | 1   | 0.000929 | 0 | 0 |
| Sleep disorders and disturbances                                   | 411 | 2.191157 | 0 | 0        | 0 | 0 | 0 | 0 | 30  | 0.042704 | 0 | 0 | 15  | 0.013938 | 0 | 0 |
| <b>Somatic symptom and related disorders</b>                       |     |          |   |          |   |   |   |   |     |          |   |   | 1   | 0.000929 |   |   |
| Suicidal and self-injurious behaviours NEC                         | 96  | 0.511803 | 2 | 0.010663 | 0 | 0 | 0 | 0 | 3   | 0.00427  | 0 | 0 | 2   | 0.001858 | 0 | 0 |
|                                                                    |     |          |   |          |   |   |   |   |     |          |   |   |     |          |   |   |
| <b>Renal and urinary disorders</b>                                 | 11  | 0.058644 |   | 0        |   | 0 |   | 0 |     | 0        |   | 0 | 3   | 0.002788 |   | 0 |
| Nephropathies                                                      | 0   | 0        | 0 | 0        | 0 | 0 | 0 | 0 | 0   | 0        | 0 | 0 | 0   | 0        | 0 | 0 |
| <b>Bladder and bladder neck disorders (excl calculi)</b>           |     |          |   |          |   |   |   |   |     |          |   |   | 1   | 0.000929 |   |   |
| Renal disorders (excl nephropathies)                               | 0   | 0        | 0 | 0        | 0 | 0 | 0 | 0 | 0   | 0        | 0 | 0 | 2   | 0.001858 | 0 | 0 |
| Urethral disorders (excl calculi)                                  | 0   | 0        | 0 | 0        | 0 | 0 | 0 | 0 | 0   | 0        | 0 | 0 | 0   | 0        | 0 | 0 |
| Urinary tract signs and symptoms                                   | 11  | 0.058644 | 0 | 0        | 0 | 0 | 0 | 0 | 3   | 0.00427  | 0 | 0 | 0   | 0        | 0 | 0 |
|                                                                    |     |          |   |          |   |   |   |   |     |          |   |   |     |          |   |   |
| <b>Reproductive system and breast disorders</b>                    | 2   | 0.010663 |   | 0        |   | 0 |   | 0 |     | 0        |   | 0 |     | 0        |   | 0 |
| Breast disorders                                                   | 0   | 0        | 0 | 0        | 0 | 0 | 0 | 0 | 0   | 0        | 0 | 0 | 2   | 0.001858 | 0 | 0 |
| Menstrual cycle and uterine bleeding disorders                     | 0   | 0        | 0 | 0        | 0 | 0 | 0 | 0 | 5   | 0.007117 | 0 | 0 | 0   | 0        | 0 | 0 |
| Reproductive tract disorders NEC                                   | 0   | 0        | 0 | 0        | 0 | 0 | 0 | 0 | 1   | 0.001423 | 0 | 0 | 0   | 0        | 0 | 0 |
| Sexual function and fertility disorders                            | 0   | 0        | 0 | 0        | 0 | 0 | 0 | 0 | 0   | 0        | 0 | 0 | 0   | 0        | 0 | 0 |
| Testicular and epididymal disorders                                | 1   | 0.005331 | 0 | 0        | 0 | 0 | 0 | 0 | 0   | 0        | 0 | 0 | 0   | 0        | 0 | 0 |
| Uterine, pelvic and broad ligament disorders                       | 1   | 0.005331 | 0 | 0        | 0 | 0 | 0 | 0 | 0   | 0        | 0 | 0 | 0   | 0        | 0 | 0 |
| Vulvovaginal disorders (excl infections and inflammations)         | 0   | 0        | 0 | 0        | 0 | 0 | 0 | 0 | 1   | 0.001423 | 0 | 0 | 1   | 0.000929 | 0 | 0 |
|                                                                    |     |          |   |          |   |   |   |   |     |          |   |   |     |          |   |   |
| <b>Respiratory, thoracic and mediastinal disorders</b>             | 128 |          |   | 0        |   | 0 |   | 0 |     | 0        |   | 0 | 259 | 0.240663 |   | 0 |
| Bronchial disorders (excl neoplasms)                               | 21  | 0.111957 | 0 | 0        | 0 | 0 | 0 | 0 | 108 | 0.153735 | 0 | 0 | 75  | 0.06969  | 0 | 0 |
| Lower respiratory tract disorders (excl obstruction and infection) | 3   | 0.015994 | 0 | 0        | 0 | 0 | 0 | 0 | 1   | 0.001423 | 0 | 0 | 3   | 0.002788 | 0 | 0 |
| Pleural disorders                                                  | 0   | 0        | 0 | 0        | 0 | 0 | 0 | 0 | 0   | 0        | 0 | 0 | 1   | 0.000929 | 0 | 0 |
| Pulmonary vascular disorders                                       | 0   | 0        | 0 | 0        | 0 | 0 | 0 | 0 | 0   | 0        | 0 | 0 | 0   | 0        | 0 | 0 |

|                                                                 |     |          |   |   |   |   |   |   |     |          |   |   |     |          |  |   |
|-----------------------------------------------------------------|-----|----------|---|---|---|---|---|---|-----|----------|---|---|-----|----------|--|---|
| Respiratory disorders NEC                                       | 44  | 0.234576 | 0 | 0 | 0 | 0 | 0 | 0 | 265 | 0.377219 | 0 | 0 | 144 | 0.133805 |  | 0 |
| Respiratory tract signs and symptoms                            | 32  | 0.170601 | 0 | 0 | 0 | 0 | 0 | 0 | 142 | 0.202132 | 0 | 0 | 31  | 0.028805 |  | 0 |
| Upper respiratory tract disorders (excl infections)             | 28  | 0.149276 | 0 | 0 | 0 | 0 | 0 | 0 | 71  | 0.101066 | 0 | 0 | 5   | 0.004646 |  | 0 |
|                                                                 |     |          |   |   |   |   |   |   |     |          |   |   |     |          |  |   |
| <b>Skin and subcutaneous tissue disorders</b>                   | 149 | 0.794361 |   | 0 |   | 0 |   | 0 |     | 0        |   | 0 | 64  | 0.059469 |  | 0 |
| Angioedema and urticaria                                        | 30  | 0.159938 | 0 | 0 | 0 | 0 | 0 | 0 | 19  | 0.027046 | 0 | 0 | 10  | 0.009292 |  | 0 |
| Cornification and dystrophic skin disorders                     | 0   | 0        | 0 | 0 | 0 | 0 | 0 | 0 | 2   | 0.002847 | 0 | 0 | 0   | 0        |  | 0 |
| Epidermal and dermal conditions                                 | 87  | 0.463822 | 0 | 0 | 0 | 0 | 0 | 0 | 141 | 0.200709 | 0 | 0 | 44  | 0.040885 |  | 0 |
| Pigmentation disorders                                          | 0   | 0        | 0 | 0 | 0 | 0 | 0 | 0 | 1   | 0.001423 | 0 | 0 | 0   | 0        |  | 0 |
| Skin and subcutaneous tissue disorders NEC                      | 2   | 0.010663 | 0 | 0 | 0 | 0 | 0 | 0 | 0   | 0        | 0 | 0 | 1   | 0.000929 |  | 0 |
| Skin appendage conditions                                       | 29  | 0.154607 | 0 | 0 | 0 | 0 | 0 | 0 | 13  | 0.018505 | 0 | 0 | 8   | 0.007434 |  | 0 |
| Skin vascular abnormalities                                     | 1   | 0.005331 | 0 | 0 | 0 | 0 | 0 | 0 | 1   | 0.001423 | 0 | 0 | 1   | 0.000929 |  | 0 |
|                                                                 |     |          |   |   |   |   |   |   |     |          |   |   |     |          |  |   |
| <b>Social circumstances</b>                                     | 3   | 0.015994 |   | 0 |   | 0 |   | 0 |     | 0        |   | 0 | 5   | 0.004646 |  | 0 |
| Legal issues                                                    | 1   | 0.005331 | 0 | 0 | 0 | 0 | 0 | 0 | 0   | 0        | 0 | 0 | 0   | 0        |  | 0 |
| Lifestyle issues                                                | 2   | 0.010663 | 0 | 0 | 0 | 0 | 0 | 0 | 1   | 0.001423 | 0 | 0 | 5   | 0.004646 |  | 0 |
|                                                                 |     |          |   |   |   |   |   |   |     |          |   |   |     |          |  |   |
| <b>Surgical and medical procedures</b>                          | 3   | 0.015994 |   | 0 |   | 0 |   | 0 |     | 0        |   | 0 | 5   | 0.004646 |  | 0 |
| Bone and joint therapeutic procedures                           | 0   | 0        | 0 | 0 | 0 | 0 | 0 | 0 | 0   | 0        | 0 | 0 |     | 0        |  | 0 |
| Gastrointestinal therapeutic procedures                         | 1   | 0.005331 | 0 | 0 | 0 | 0 | 0 | 0 | 0   | 0        | 0 | 0 | 1   | 0.000929 |  | 0 |
| Obstetric and gynaecological therapeutic procedures             | 1   | 0.005331 | 0 | 0 | 0 | 0 | 0 | 0 | 0   | 0        | 0 | 0 | 1   | 0.000929 |  | 0 |
| Therapeutic procedures and supportive care NEC                  | 1   | 0.005331 | 0 | 0 | 0 | 0 | 0 | 0 | 1   | 0.001423 | 0 | 0 | 3   | 0.002788 |  | 0 |
|                                                                 |     |          |   |   |   |   |   |   |     |          |   |   |     |          |  |   |
| <b>Vascular disorders</b>                                       | 8   | 0.04265  |   | 0 |   | 0 |   | 0 |     | 0        |   | 0 | 11  | 0.010221 |  | 0 |
| Arteriosclerosis, stenosis, vascular insufficiency and necrosis | 1   | 0.005331 | 0 | 0 | 0 | 0 | 0 | 0 | 1   | 0.001423 | 0 | 0 | 0   | 0        |  | 0 |
| Decreased and nonspecific blood pressure disorders and shock    | 1   | 0.005331 | 0 | 0 | 0 | 0 | 0 | 0 | 4   | 0.005694 | 0 | 0 | 1   | 0.000929 |  | 0 |
| Embolism and thrombosis                                         | 0   | 0        | 0 | 0 | 0 | 0 | 0 | 0 | 4   | 0.005694 | 0 | 0 | 0   | 0        |  | 0 |
| Vascular disorders NEC                                          | 3   | 0.015994 | 0 | 0 | 0 | 0 | 0 | 0 | 3   | 0.00427  | 0 | 0 | 4   | 0.003717 |  | 0 |
| Vascular haemorrhagic disorders                                 | 0   | 0        | 0 | 0 | 0 | 0 | 0 | 0 | 2   | 0.002847 | 0 | 0 | 0   | 0        |  | 0 |
| Vascular hypertensive disorders                                 | 2   | 0.010663 | 0 | 0 | 0 | 0 | 0 | 0 | 1   | 0.001423 | 0 | 0 | 6   | 0.005575 |  | 0 |
| Vascular infections and inflammations                           | 1   | 0.005331 | 0 | 0 | 0 | 0 | 0 | 0 | 0   | 0        | 0 | 0 | 0   | 0        |  | 0 |
| Venous varices                                                  | 0   | 0        | 0 | 0 | 0 | 0 | 0 | 0 | 1   | 0.001423 | 0 | 0 | 0   | 0        |  | 0 |
